# Supplementary material for: Tunable wettability via counterion exchange of polyelectrolyte brushes grafted on cotton fabric
Source: Royal Society of Chemistry journal article supplement (doi:10.1039/c2nj40246g), 2012-01-01
Supplement: c2nj40246g.pdf [file c2nj40246g.pdf]

# **Tunable wettability via counterion exchange of the polyelectrolyte brushes grafting on cotton fabric**

*Cheng Jiang<sup>a,b</sup>, Qihua Wang<sup>a,\*</sup> and Tingmei Wang<sup>a</sup>*

<sup>a</sup> State Key Laboratory of Solid Lubrication, Lanzhou Institute of Chemical Physics,

Chinese Academy of Sciences, Lanzhou 730000, PR China

<sup>b</sup> Graduate School, Chinese Academy of Sciences, Beijing 100039, PR China

\*Corresponding author. E-mail: [Wangqh@lzb.ac.cn](mailto:Wangqh@lzb.ac.cn)

**Table S1.** The CA of the PMETAC films in different solvents.

| H <sub>2</sub> O/CH <sub>3</sub> OH(V/V) |                  | 1/0 | 3/1 | 1/1 | 1/3 | 0/1 |
|------------------------------------------|------------------|-----|-----|-----|-----|-----|
| CA(°)in different                        | PFO              | 152 | 153 | 154 | 154 | 154 |
| solvents                                 | SCN <sup>-</sup> | 152 | 150 | < 5 | < 5 | < 5 |

Five volume ratios of H<sub>2</sub>O and CH<sub>3</sub>OH were selected to study the wettability change of PMETAC films bearing with PFO and SCN<sup>-</sup> respectively. We found that when the volume ratio of H<sub>2</sub>O/CH<sub>3</sub>OH was 3/1, the wettability of the PMETAC films after exchange from PFO to SCN<sup>-</sup> showed almost no change. However, the wettability switch can be realized when the volume ratio CH<sub>3</sub>OH was further increased. In H<sub>2</sub>O and CH<sub>3</sub>OH mixture, when the ratio of CH<sub>3</sub>OH was too low, the poorly solvated PFO ions mainly surrounded by water molecule and the counterion exchange from PFO to SCN<sup>-</sup> was incomplete, so the wettability showed little change. While the volume ratio of CH<sub>3</sub>OH increased, the reversible switch of PMETAC film can be achieved.

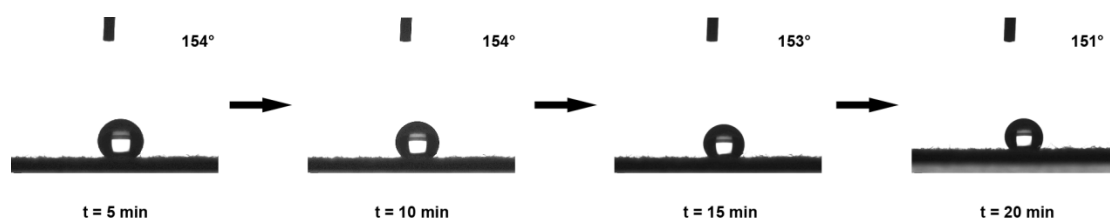

**Figure S1.** The stability of the CA on the PMETAC films bearing with PFO immersing in CH<sub>3</sub>OH/H<sub>2</sub>O (V/V: 1/1) mixture.

The CA values were measured at room temperature (about 22 °C) and the relative humidity was about 40 %.

The stability of the CA was measured on the same sample when a water droplet was deposited on the surface after 1 min up to 20 min.
